# Supplementary material for: Adhesion and bending rigidity-mediated wrapping of carbon nanotubes by a substrate-supported cell membrane
Source: Royal Society of Chemistry journal article supplement (doi:10.1039/c5ra04426j), 2015-01-01
Supplement: c5ra04426j1.pdf [file c5ra04426j1.pdf]

## **Supporting Information for:**

# Adhesion and bending rigidity-mediated wrapping of carbon nanotubes by substrate-supported cell membrane

Yonggang Zheng, Huayuan Tang, Hongfei Ye and Hongwu Zhang\*

State Key Laboratory of Structural Analysis for Industrial Equipment, Department of  
Engineering Mechanics, Faculty of Vehicle Engineering and Mechanics, Dalian University of  
Technology, Dalian 116024, P. R. China.

\* Email: zhanghw@dlut.edu.cn

## 1. Adhesion energy calculation

Because the system investigated here is two-dimensional, to calculate the integration over the arc length, the interaction between two infinite lines should be derived. Integrating the LJ potential along the infinite line, the cohesive energy per length between two parallel lines with distance  $h$  can be expressed as<sup>1</sup>,

$$\Phi_1(h) = \frac{3\pi\varepsilon_{cm}\rho_m\rho_c\sigma_{cm}}{64} \left[ 21\left(\frac{\sigma_{cm}}{h}\right)^{11} - 32\left(\frac{\sigma_{cm}}{h}\right)^5 \right], \quad (S1)$$

The adhesion strength between two surfaces is usually characterized by the adhesion energy per area  $U_{cm}$ . The relations between  $U_{cm}$  and  $\rho_m$ ,  $\rho_c$  and  $\varepsilon_{cm}$  can be derived as follows. The van der

Waals interaction energy between an area element  $dA$  and an infinite sheet is  $\rho_m dA \int_0^x V(r) \rho_c 2\pi x dx$ ,

so the adhesive energy per area between an area element and an infinite sheet is<sup>2,3</sup>

$$\Phi_2(h) = \frac{\rho_m dA \int_0^x V(r) \rho_c 2\pi x dx}{dA} = 4\pi\varepsilon_{cm}\rho_m\rho_c\sigma_{cm}^6 \left( \frac{\sigma_{cm}^6}{5h^{10}} - \frac{1}{2h^4} \right). \quad (S2)$$

The equilibrium separation distance can be determined by  $\partial\Phi_2/\partial h = 0$ , which leads to  $h = \sigma_{cm}$ .

So the adhesion energy in equilibrium is  $U_{cm} = -\Phi_2(\sigma_{cm}) = \frac{6}{5}\pi\varepsilon_{cm}\rho_m\rho_c\sigma_{cm}^2$ . Then  $\Phi_1$  and  $\Phi_2$  can be expressed

$$\Phi_1(h) = \frac{5U_{cm}}{128\sigma_{cm}} \left[ 21\left(\frac{\sigma_{cm}}{h}\right)^{11} - 32\left(\frac{\sigma_{cm}}{h}\right)^5 \right], \quad (S3)$$

$$\Phi_2(h) = \frac{10U_{cm}}{3} \left[ \frac{1}{5}\left(\frac{\sigma_{cm}}{h}\right)^{10} - \frac{1}{2}\left(\frac{\sigma_{cm}}{h}\right)^4 \right]. \quad (S4)$$

Combining Eqs. (4) and (S3), the adhesion energy between CNT and the membrane can finally be expressed as

$$E_{cm} = \iint \frac{5U_{cm}}{128\sigma_{cm}} \left[ 21 \left( \frac{\sigma_{cm}}{h} \right)^{11} - 32 \left( \frac{\sigma_{cm}}{h} \right)^5 \right] ds_c ds_m. \quad (\text{S5})$$

## 2. Energy diagrams

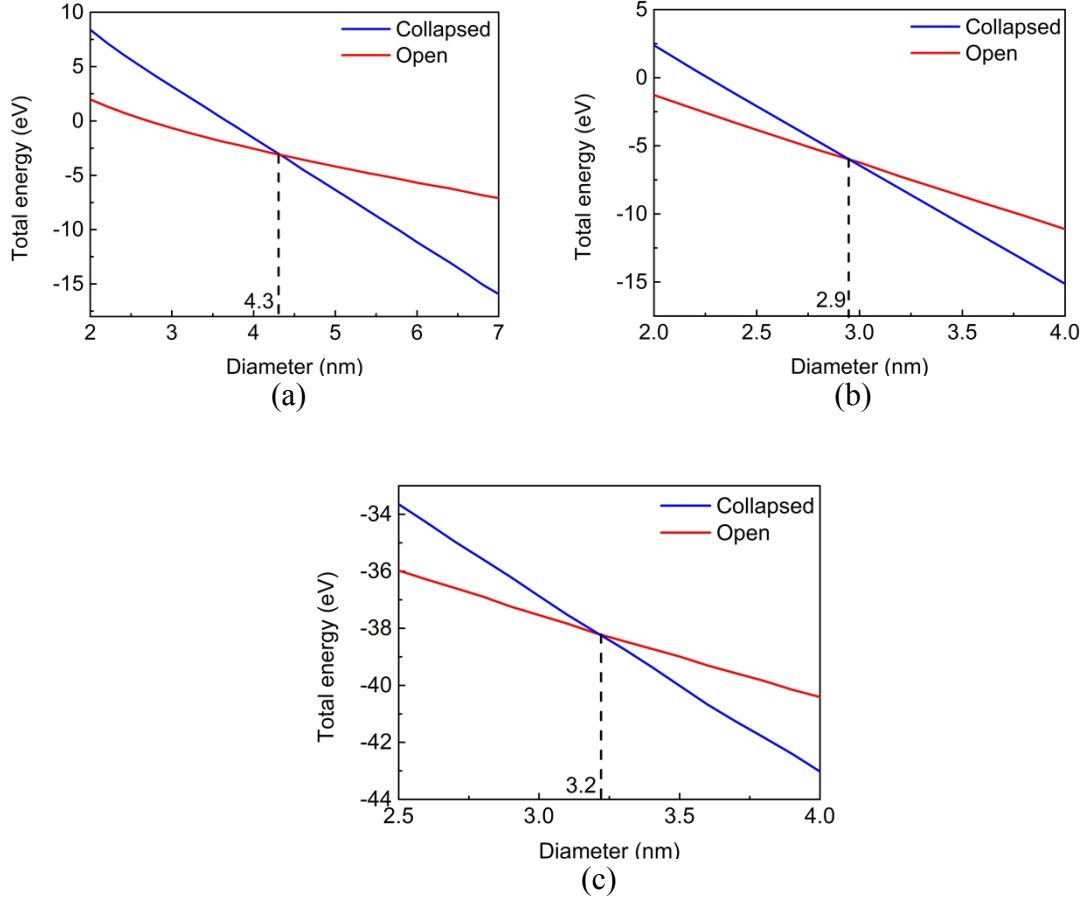

**Fig. S1.** Energy diagrams of systems with open (red lines) and collapsed (blue lines) CNTs: (a) free CNTs, (b) CNTs on a substrate and (c) CNT-membrane-substrate system. ( $D_m = 4.0$  eV,  $U_{cm} = 0.64$  eV/nm<sup>2</sup>,  $\sigma = 2 \times 10^{-3}$  eV/nm<sup>2</sup>).

## 3. Transition between the neighbor minima.

To explore the transition between the neighbor minima, we used the nudged elastic band (NEB) algorithm to determine the energy barrier and minimum energy path of the transition. For CNT with  $d = 3.5 \text{ nm}$  covered by membrane with  $D_m = 4.0 \text{ eV}$  and  $U_{cm} = 0.64 \text{ eV/nm}^2$ , the collapsed configuration is more energetic stable than the open configuration and the energy difference is about  $1.00 \text{ eV/nm}$ . **Fig. S2** shows the results of the NEB calculations. The transition state occurs late along the path and the energy barrier is about  $3.65 \text{ eV/nm}$  from the open configuration to the collapsed one.

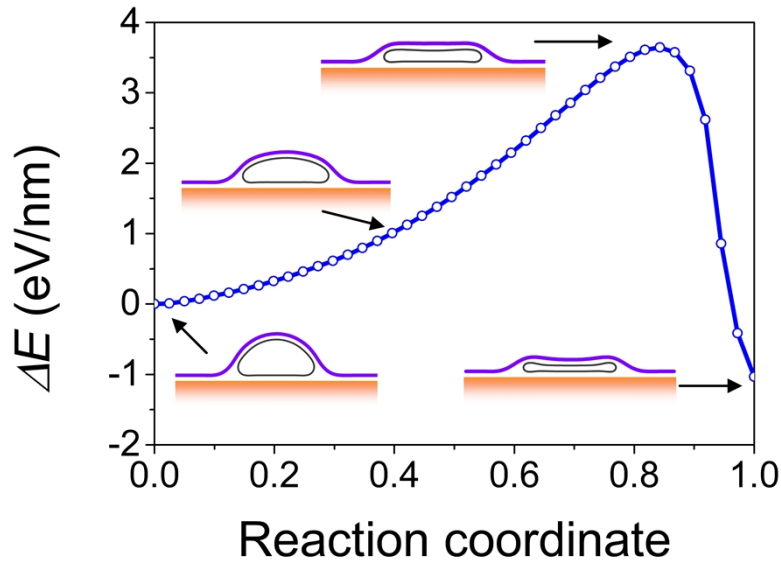

**Fig. S2.** The minimum energy path for the collapse of CNT covered substrate-supported membrane ( $D_m = 4.0 \text{ eV}$ ,  $U_{cm} = 0.64 \text{ eV/nm}^2$ ,  $d = 3.5 \text{ nm}$ ). The zero of energy is relative to the open configuration and the energies are per unit length. The insets are configurations along the minimum energy path.

#### 4. Approximate expression of the phase boundary in Fig. 6

In this section, simple modes are employed to give approximate expression of the phase boundary in Fig. 6. For the open configuration, the configuration of CNT is modeled by a semicircle with radius of  $R$ , which satisfies the relationship  $\pi R + 2R = \pi d$ . The bending energy of

the CNT and membrane are  $E_{bc} = \frac{D_c}{2} \left(\frac{1}{R}\right)^2 \pi R = \frac{D_c \pi}{2R}$  and  $E_{bm} = \frac{D_m}{2} \left(\frac{1}{R+h}\right)^2 \pi(R+h) = \frac{D_m \pi}{2R+h}$ ,

respectively. The CNT-membrane interaction energy is  $E_{cm} = -\pi R U_{cm}$  and the CNT-substrate interaction energy is  $E_{sc} = -2R U_{sc}$ . The membrane-substrate interaction energy is  $E_{sm} = -(2L - 2R - 2h) U_{sm}$ . For the collapsed configuration, the bending energy of the CNT is

mainly localized at the two highly strained ends, which can be modeled by two semicircles with radius of  $h$ , yielding  $E_{bc} = \frac{D_c}{2} \left(\frac{1}{h}\right)^2 2\pi h = \frac{D_c 2\pi}{2h}$ . The van der Waals self-interaction of the CNT is

approximated by  $E_{cc} = -\frac{1}{2} \pi d U_{cc}$ . The membrane adopts a flatten configuration and its bending

energy can be neglected in this simple model. Similar with the open configuration, the CNT-

membrane and CNT-substrate are  $E_{cm} = -\frac{1}{2} \pi d U_{cm}$  and  $E_{sc} = -\frac{1}{2} \pi d U_{sc}$ , respectively. The membrane-

substrate interaction energy is  $E_{sm} = -(2L - \frac{1}{2} \pi d - \alpha h) U_{sm}$ , where  $\alpha$  is an adjustment factor to

consider the excessive length of the membrane detaching from the substrate as compared with

the contact length between the CNT and the substrate, and here the adjustment factor equals

approximately to 3 for the considered system. By equating the total energy of the open and

collapsed configurations,  $U_{cm}$  can be expressed by  $D_m$  as

$$U_{cm} = \frac{2}{2R-d} \left[ \frac{D_m}{2(R+h)} - \frac{D_c}{2} \left( \frac{2}{h} - \frac{1}{R} \right) + \frac{d}{2} U_{cc} + \left( \frac{d}{2} - \frac{2R}{\pi} \right) (U_{sc} - U_{sm}) - \frac{h}{\pi} U_{sm} \right]. \quad (S6)$$

Let  $d = 3.5 \text{ nm}$ ,  $U_{sc} = U_{sm} = U_{cc} = 2.29 \text{ eV/nm}^2$  and  $h = 0.34 \text{ nm}$ , the phase boundary in Fig. 6 can be approximated by

$$U_{cm} = 0.519D_m - 0.079. \quad (\text{S7})$$

The line is plotted in Fig. 6, which turns to be consistent with our calculation.

## 5. Configuration regulated by the distance between two CNTs

Besides the bending stiffness of the membrane, the morphology of the system can also be regulated by the center distance between the CNTs. The results for the systems with  $d_s$  varying from  $2.00 \text{ nm}$  to  $3.25 \text{ nm}$  are plotted in Fig. S3a. When the spacing between the CNTs is small, the membrane remains nearly flat and doesn't adhere to the substrate. In these cases,  $y_m^0 = 2.10 \text{ nm}$  when  $D_m = 3.0 \text{ eV}$  and  $y_m^0 = 2.30 \text{ nm}$  when  $D_m = 2.0 \text{ eV}$ , respectively. This is due to that the energy reduced by conforming to the CNTs and adhering to the substrate doesn't compensate the cost of membrane bending. On the other hand, when the spacing between two CNTs is large, the membrane will conform to the CNT and adhere to the substrate to gain the adhesion energy. In this case,  $y_m^0$  is equal to the equilibrium distance between the membrane and the substrate. Similar to the case with various  $D_m$ , snap-through instability is also observed here. That is, for  $D_m = 2.0 \text{ eV}$  when  $d_s$  slightly increases from  $2.40 \text{ nm}$  to  $2.50 \text{ nm}$ , the membrane morphology between two CNTs sharply switches from adhering to the substrate to detaching from the substrate. When  $D_m$  increases to  $3.0 \text{ eV}$ , the critical spacing  $d_c^{cr}$  increases to about  $2.80 \text{ nm}$ , implying that larger spacing is needed for stiffer membrane to conform to the CNTs. Typical configurations with various CNTs spacings are shown in Fig. S3b.

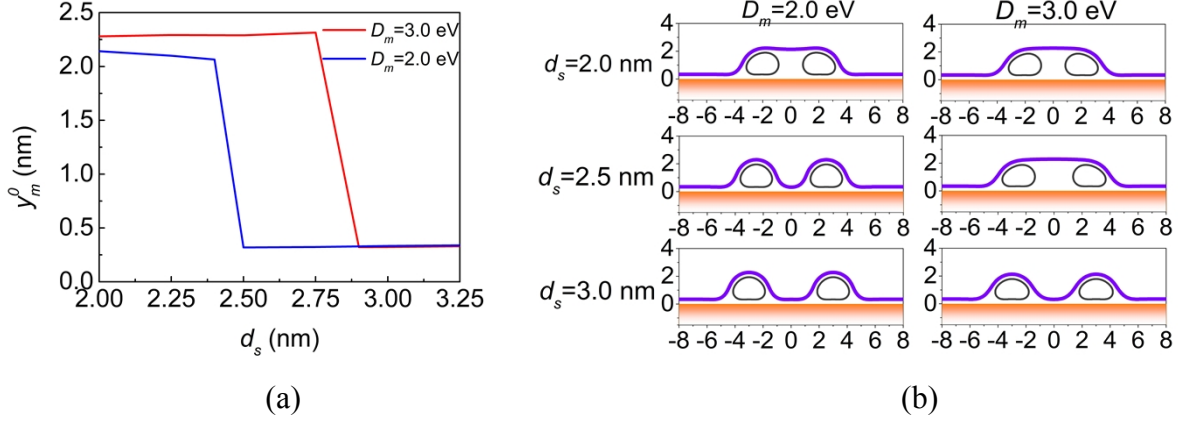

**Fig. S3.** (a)  $y_m^0$  as a function of  $d_s$  when  $D_m = 2.0$  eV (blue line) and  $D_m = 3.0$  eV (red line). (b) Morphologies of the systems for the CNTs spacing of  $d_s = 2.0$  nm,  $2.5$  nm and  $3.0$  nm, from top to bottom, respectively.

## References

1. J. Zhao, J.-W. Jiang, Y. Jia, W. Guo and T. Rabczuk, *Carbon*, 2013, **57**, 108.
2. T. Tang, A. Jagota and C.-Y. Hui, *J. Appl. Phys.*, 2005, **97**, 074304.
3. L. Y. Jiang, Y. Huang, H. Jiang, G. Ravichandran, H. Gao, K. C. Hwang and B. Liu, *J. Mech. Phys. Solids*, 2006, **54**, 2436.
